# Supplementary material for: A novel zinc(ii) metal–organic framework with a diamond-like structure: synthesis, study of thermal robustness and gas adsorption properties
Source: Royal Society of Chemistry journal article supplement (doi:10.1039/c5dt02437d), 2015-12-02
Supplement: c5dt02437d1.pdf [file c5dt02437d1.pdf]

## Supplementary material

### **Novel zinc(II) metal-organic framework with diamond-like structure: synthesis, study of thermal robustness and gas adsorption properties**

Miroslav Almáši<sup>a</sup>, Vladimír Zelenák<sup>\*,a</sup>, Arnošt Zuka<sup>b</sup>, Juraj Kuchár<sup>a</sup>, Jiří Čejka<sup>b</sup>

<sup>a</sup>Department of Inorganic Chemistry, Faculty of Science, Pavol Jozef Šafárik University, Moyzesova 11, 041 54 Košice, Slovak Republic

<sup>b</sup>Department of Synthesis and Catalysis, J. Heyrovský Institute of Physical Chemistry of the ASCR, v.v.i., Academy of Sciences of the Czech Republic, Dolejškova 2155/3, 128 23 Prague, Czech Republic

\*corresponding author; e-mail: vladimir.zelenak@upjs.sk

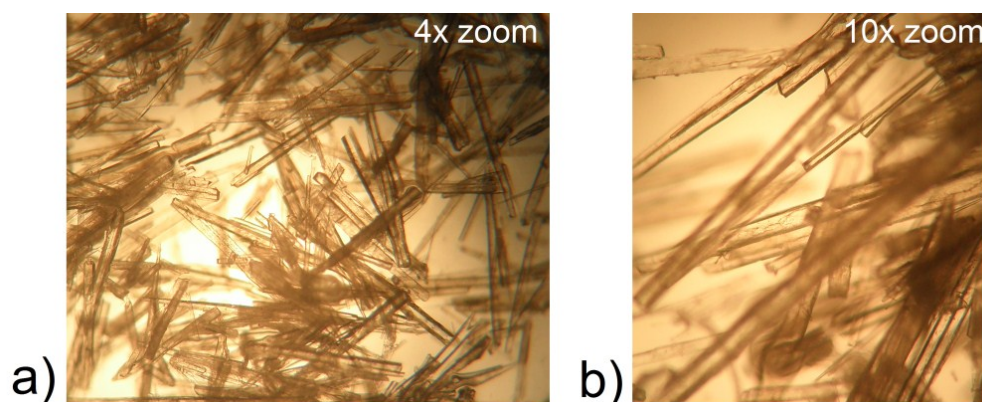

**Fig. S1** Optical microscopy images of crystals of compound **1** stored in Formblin<sup>®</sup> oil:

a) 4 x zoom, b) 10 x zoom.

**Table S1** Crystal data and structure refinement summary for complex  $\{[\text{Zn}_2(\mu_4\text{-MTB})(\kappa^4\text{-CYC})_2]\cdot 2\text{DMF}\cdot 7\text{H}_2\text{O}\}_n$ .

|                                            |                                                                                                          |                                                                    |                                                    |
|--------------------------------------------|----------------------------------------------------------------------------------------------------------|--------------------------------------------------------------------|----------------------------------------------------|
| Formula                                    | $\{[\text{Zn}_2(\mu_4\text{-MTB})(\kappa^4\text{-CYC})_2]\cdot 2\text{DMF}\cdot 7\text{H}_2\text{O}\}_n$ | Monochromator                                                      | graphite                                           |
| Empirical formula                          | $\text{Zn}_2\text{C}_{55}\text{H}_{92}\text{N}_{10}\text{O}_{17}$                                        | $\theta$ range (°)                                                 | 3.121-26.49                                        |
| Formula weight                             | 1296                                                                                                     | Reflections measured                                               | 12 383                                             |
| <i>Crystal parameters</i>                  |                                                                                                          | Independent reflections                                            | 3792                                               |
| Crystal shape                              | needle                                                                                                   | Reflections observed <sup>#</sup>                                  | 1733                                               |
| Crystal colour                             | colourless                                                                                               | Linear abs. coeff. (mm <sup>-1</sup> )                             | 0.720                                              |
| Crystal size (mm)                          | 0.5 x 0.1 x 0.1                                                                                          | <i>F</i> (000)                                                     | 1376                                               |
|                                            |                                                                                                          | Reflections for cell measure.                                      | 23353 with 3.223 < $\theta$ < 26.24                |
| Crystal system                             | tetragonal                                                                                               | <i>h</i>                                                           | -21 to 21                                          |
| Space group (number)                       | <i>P</i> 4/ <i>n</i> (85)                                                                                | <i>k</i>                                                           | -21 to 14                                          |
| <i>Unit cell dimensions</i>                |                                                                                                          | <i>l</i>                                                           | -10 to 15                                          |
| <i>a</i> (Å)                               | 17.1627 (10)                                                                                             |                                                                    |                                                    |
| <i>c</i> (Å)                               | 12.407 (2)                                                                                               | <i>Refinement</i>                                                  |                                                    |
| <i>V<sub>c</sub></i> (Å <sup>3</sup> )     | 3654.6 (7)                                                                                               | Refinement method                                                  | full matrix least-squares on <i>F</i> <sup>2</sup> |
| Molecules per cell, <i>Z</i>               | 2                                                                                                        | Parameters                                                         | 153                                                |
| <i>D<sub>x</sub></i> (g.cm <sup>-3</sup> ) | 1.178                                                                                                    | Goodness-of-fit on <i>F</i> <sup>2</sup>                           | 0.947                                              |
|                                            |                                                                                                          | <i>R<sub>int</sub></i>                                             | 0.114                                              |
| <i>Meas. of intensity data</i>             |                                                                                                          | <i>R<sub>I</sub></i> (observed/all)                                | 0.0639 / 0.1310                                    |
| Instrument                                 | Xcalibur2                                                                                                | <i>wR<sub>2</sub></i> (observed/all)*                              | 0.1647 / 0.2013                                    |
| Temperature (°C)                           | -100 (2)                                                                                                 | Max. and min. height in final diff. synthesis (e.Å <sup>-3</sup> ) | 0.413 and -0.554                                   |
| Radiation $\lambda$ (Å)                    | 0.71073                                                                                                  |                                                                    |                                                    |

<sup>#</sup>  $[I > 2\sigma(I)]$ , \*  $w = 1/[\sigma^2(F_o^2) + (0.1463P)^2]$  where  $P = (F_o^2 + 2F_c^2)/3$ .

**Table S2** Selected bond distances (Å) and angles (°) in the crystal structure of  $\{[\text{Zn}_2(\mu_4\text{-MTB})(\kappa^4\text{-CYC})_2]\cdot 2\text{DMF}\cdot 7\text{H}_2\text{O}\}_n$ .

| <b>Bond distances</b>               |            |                                           |             |
|-------------------------------------|------------|-------------------------------------------|-------------|
| Zn–N1 <sup>i</sup>                  | 2.125 (4)  | C2–C3                                     | 1.486 (8)   |
| Zn–N1                               | 2.125 (4)  | C4–C5 <sup>i</sup>                        | 1.516 (8)   |
| Zn–N2 <sup>i</sup>                  | 2.089 (4)  | C6–C7                                     | 1.564 (7)   |
| Zn–N2                               | 2.089 (4)  | C7–C8                                     | 1.361 (6)   |
| Zn–O1 <sup>i</sup>                  | 2.195 (3)  | C7–C12                                    | 1.379 (6)   |
| Zn–O1                               | 2.195 (3)  | C8–C9                                     | 1.390 (6)   |
| O1–C6                               | 1.223 (5)  | C9–C10                                    | 1.392 (6)   |
| O2–C6                               | 1.207 (6)  | C10–C11                                   | 1.389 (6)   |
| N1–C1                               | 1.452 (7)  | C11–C12                                   | 1.406 (6)   |
| N1–C5                               | 1.488 (7)  | C10–C13                                   | 1.552 (4)   |
| N2–C3                               | 1.470 (6)  | C10 <sup>ii</sup> –C13                    | 1.552 (4)   |
| N2–C4                               | 1.442 (7)  | C10 <sup>iii</sup> –C13                   | 1.552 (4)   |
| C1–C2                               | 1.542 (9)  | C10 <sup>iv</sup> –C13                    | 1.552 (4)   |
| <b>Bond angles</b>                  |            |                                           |             |
| N1–Zn–N2                            | 94.51 (18) | O1–C6–C7                                  | 114.9 (4)   |
| N1–Zn–N2 <sup>i</sup>               | 85.49 (18) | O2–C6–C7                                  | 116.2 (5)   |
| N1 <sup>i</sup> –Zn–N2              | 85.49 (18) | C1–N1–C5                                  | 115.2 (4)   |
| N1 <sup>i</sup> –Zn–N2 <sup>i</sup> | 94.50 (18) | C4–N2–C3                                  | 115.3 (4)   |
| N2–Zn–N2 <sup>i</sup>               | 180.0      | C1–C2–C3                                  | 117.8 (5)   |
| N1–Zn–O1                            | 88.24 (15) | C6–C7–C8                                  | 119.7 (4)   |
| N1 <sup>i</sup> –Zn–O1              | 91.76 (15) | C6–C7–C12                                 | 121.4 (4)   |
| N1 <sup>i</sup> –Zn–O1 <sup>i</sup> | 88.24 (15) | C7–C8–C9                                  | 120.8 (4)   |
| N1–Zn–O1 <sup>i</sup>               | 91.76 (15) | C7–C12–C11                                | 121.2 (4)   |
| N2–Zn–O1                            | 93.06 (14) | C8–C7–C12                                 | 118.9 (4)   |
| N2 <sup>i</sup> –Zn–O1              | 86.94 (14) | N2–C4–C5 <sup>i</sup>                     | 110.5 (4)   |
| N2 <sup>i</sup> –Zn–O1 <sup>i</sup> | 93.06 (14) | C8–C9–C10                                 | 121.4 (4)   |
| N2–Zn–O1 <sup>i</sup>               | 86.94 (14) | C9–C10–C11                                | 117.8 (4)   |
| O1 <sup>i</sup> –Zn–O1              | 180.0 (2)  | C9–C10–C13                                | 119.0 (3)   |
| Zn–O1–O6                            | 131.0 (3)  | C10–C11–C12                               | 119.8 (4)   |
| Zn–N1–C1                            | 114.9 (4)  | C10–C13–C10 <sup>ii</sup>                 | 110.97 (15) |
| Zn–N1–C5                            | 103.4 (3)  | C10–C13–C10 <sup>iii</sup>                | 110.97 (15) |
| Zn–N2–C4                            | 105.8 (3)  | C10 <sup>ii</sup> –C13–C10 <sup>iii</sup> | 106.5 (3)   |
| Zn–N2–C3                            | 115.2 (3)  | C10–C13–C10 <sup>iv</sup>                 | 106.5 (3)   |
| N1–C1–C2                            | 110.9 (5)  | C10 <sup>ii</sup> –C13–C10 <sup>iv</sup>  | 110.97 (15) |
| N1–C5–C4 <sup>i</sup>               | 110.3 (4)  | C10 <sup>iii</sup> –C13–C10 <sup>iv</sup> | 110.97 (15) |
| N2–C3–C2                            | 113.2 (5)  | C11–C10–C13                               | 123.1 (3)   |

Symmetry codes: (i)  $-x, -y, -z$ ; (ii)  $x+1/2, -y, -z+1$ ; (iii)  $-x, y-1/2, -z+1$ ; (iv)  $-x-1/2,$

-y+1/2, z.

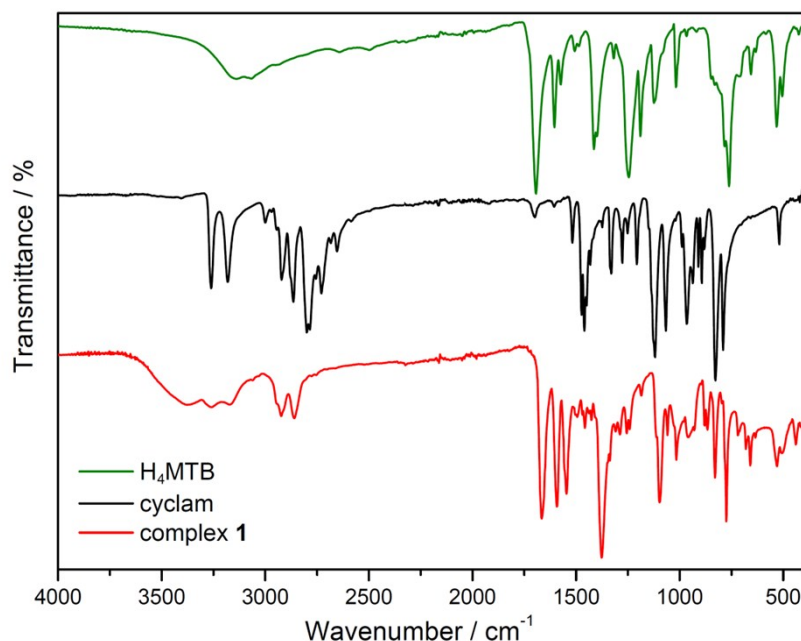

**Fig. S2** FT-IR spectra of free ligands methanetetra benoic acid (green line), cyclam (black line) and complex **1** (red line).

FT-IR spectrum of compound **1** measured at room temperature (Fig. S2) exhibits a broad absorption band centred at 3374 cm<sup>-1</sup> corresponding to stretching vibration of clathrated water molecules ( $\nu(\text{OH})_{\text{water}}$ ). The presence of cyclam molecules in compound **1** is evident from two medium intensive bands located at 3258 and 3167 cm<sup>-1</sup> corresponding to antisymmetric and symmetric stretching vibrations of N-H groups. Similarly, the stretching vibrations of CH<sub>2</sub> groups,  $\nu_{\text{as}}(\text{CH})_{\text{aliph}}$  and  $\nu_{\text{s}}(\text{CH})_{\text{aliph}}$  are present at 2923 and 2860 cm<sup>-1</sup>, respectively. Very weak absorption bands observed in the range of 3080-3030 cm<sup>-1</sup> are assigned to C-H aromatic stretching vibrations of MTB<sup>4-</sup> molecules. FT-IR spectrum exhibits very strong and sharp band at 1666 cm<sup>-1</sup> corresponding to stretching vibration of  $\nu(\text{C}=\text{O})$ , which can be attributed to DMF molecules. The evident presence of MTB<sup>4-</sup> ligand in compound **1** is reflected by the carboxylate vibrations, which dominate the IR spectra. The lack of strong absorption band at 1694 cm<sup>-1</sup> (corresponding to  $\nu(\text{C}=\text{O})$  vibration of carboxylic group of the free H<sub>4</sub>MTB, see Table S2 and Fig. S2) indicates that all carboxyl groups of

H<sub>4</sub>MTB molecule were completely deprotonated during the synthesis.

The band of antisymmetric carboxylate stretch,  $\nu_{as}(\text{COO}^-)$ , was found at 1546 cm<sup>-1</sup>, the band of symmetric  $\nu_s(\text{COO}^-)$  stretch was found at 1376 cm<sup>-1</sup> and the band of deformation  $\delta(\text{COO}^-)$  was observed at 775 cm<sup>-1</sup>, respectively. The frequencies of carboxylate stretching vibrations and the magnitude of their separation,  $\Delta = \nu_{as}(\text{COO}^-) - \nu_s(\text{COO}^-)$ , are often used as a spectroscopic criterion to determine the coordination mode of carboxylate group. Consequently, the calculated value of separation between the antisymmetric and symmetric COO<sup>-</sup> stretches was 170 cm<sup>-1</sup>. The separation value is in a good agreement with coordination mode of the carboxylate group found in compound **1** (monodentate).

**Table S3** Assignment of IR spectral data of complex **1**, methanetetra benzoic acid (H<sub>4</sub>MTB) and cyclam (CYC) (band positions are in cm<sup>-1</sup>).

|                                      | <b>compound 1</b>            | methanetetra benzoic         | cyclam (CYC)   |
|--------------------------------------|------------------------------|------------------------------|----------------|
| $\nu(\text{OH})_{\text{water}}$      | 3374 (m, br)                 | -                            | -              |
| $\nu(\text{NH})$                     | 3258 (m), 3169 (m)           | -                            | 3261 (m), 3181 |
| $\nu(\text{CH})_{\text{ar}}$         | 3077 (vw), 3061 (vw),        | 3064 (w)                     | -              |
| $\nu_s(\text{CH})_{\text{aliph}}$    | 2923 (m)                     | -                            | 2921 (m)       |
| $\nu_{as}(\text{CH})_{\text{aliph}}$ | 2860 (m)                     | -                            | 2864 (m)       |
| $\nu(\text{C=O})$                    | 1666 (s)                     | 1694 (vs)                    | -              |
| $\nu(\text{C=C})_{\text{ar}}$        | 1592 (s), 1502 (w)           | 1604 (s), 1574 (m), 1507 (w) | -              |
| $\nu_{as}(\text{COO}^-)$             | 1546 (s)                     | -                            | -              |
| $\delta(\text{C-O})$                 | + -                          | 1414(s), 1246(vs)            |                |
| $\nu_s(\text{COO}^-)$                | 1376 (vs)                    | -                            | -              |
| $\delta(\text{CCH})_{\text{ar}}$     | 1185 (w), 1097 (s), 1016 (m) | 1189 (s), 1124 (m), 1017 (w) | -              |
| $\gamma(\text{CCH})_{\text{ar}}$     | -                            | 761 (s), 784 (vs)            | -              |

(band intensity: vs – very strong, s – strong, m – medium, w – weak, vw – very weak, type of vibration: ar – aromatic, aliph – aliphatic, s – symmetric, as – antisymmetric).

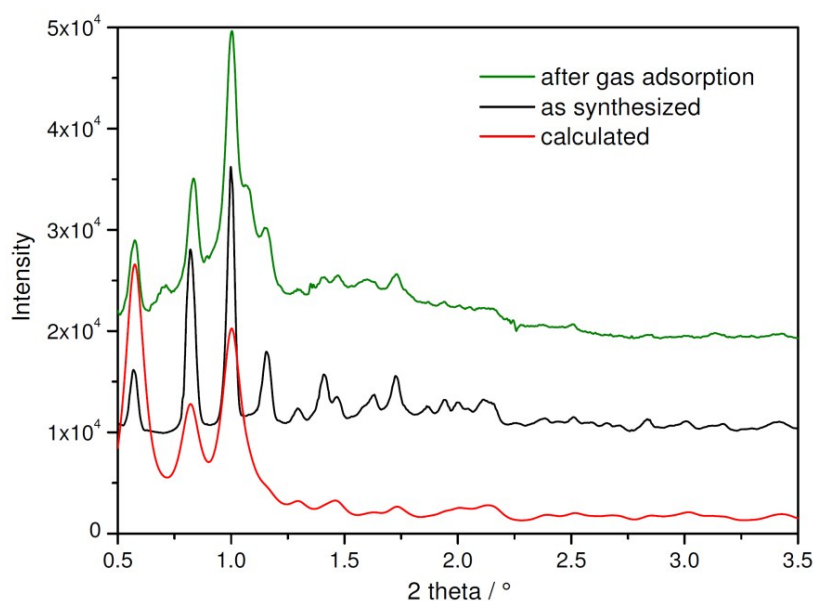

**Fig. S3** HE-PXRD patterns of **1** a) calculated from the single crystal X-ray data (red line), b) as synthesized sample (black line) and c) after adsorption measurements (green line) (sample **1'**).

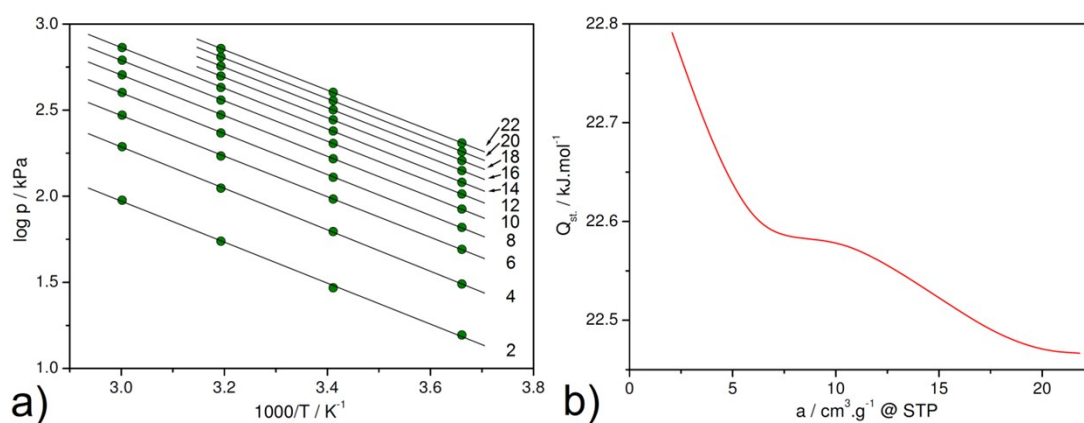

**Fig. S4** a) Adsorption isosteres of  $\text{CO}_2$ . Points were calculated by numerical interpolation/extrapolation of adsorption isotherms, lines represent linear fit. All the isosteres are marked with corresponding amount adsorbed in  $\text{cm}^3.\text{g}^{-1}$  at STP. b) Isosteric heats of adsorption of carbon dioxide on  $\{[\text{Zn}_2(\mu_4\text{-MTB})(\kappa^4\text{-CYC})_2]\}_n$ .

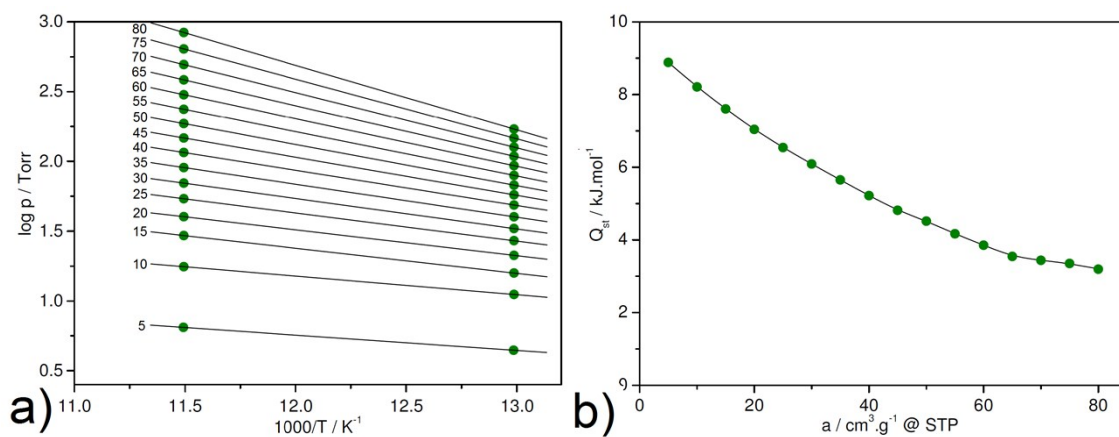

**Fig. S5** a) Adsorption isosteres of hydrogen. All the isotheres are marked with corresponding amount adsorbed in  $\text{cm}^3.\text{g}^{-1}$  at STP c) Coverage dependence of the isosteric heat of adsorption for hydrogen in **1'** calculated from the interpolation/extrapolation of the corresponding isotherms.
